# Supplementary material for: Individual-level socioeconomic status and contact or familiarity with people with mental illness: a cross-sectional study in Wuhou District, Chengdu, Southwest China
Source: Springer Nature journal article supplement (doi:10.1186/s12875-021-01422-y), 2021-04-09
Supplement: MOESM1 [file 19050952]

Additional file 1 The assigned values of categorical variables.

| Categorical variables                                                                | Value   |
|--------------------------------------------------------------------------------------|---------|
| <b>Gender</b>                                                                        |         |
| Male                                                                                 | 0       |
| Female                                                                               | 1       |
| <b>Age group (year)</b>                                                              |         |
| 18-30                                                                                | 0,0,0,0 |
| 31-45                                                                                | 1,0,0,0 |
| 46-60                                                                                | 0,1,0,0 |
| 61-75                                                                                | 0,0,1,0 |
| More than 75                                                                         | 0,0,0,1 |
| <b>Marital status</b>                                                                |         |
| Unmarried                                                                            | 0,0     |
| Married or live together                                                             | 1,0     |
| Divorced or widowed                                                                  | 0,1     |
| <b>Occupation</b>                                                                    |         |
| Large company managers, public institutions, or professional and technical personnel | 1       |
| Small company managers or assistive technicians                                      | 2       |
| Ordinary staff or clerks                                                             | 3       |
| Skilled worker                                                                       | 4       |
| Farmers, temporary workers or unemployed individuals                                 | 5       |
| <b>Current residence</b>                                                             |         |
| Urban                                                                                | 0       |
| Town or rural area                                                                   | 1       |
| <b>Educational attainment (year)</b>                                                 |         |
| Less than or equal to 9                                                              | 0       |
| More than 9                                                                          | 1       |
| <b>Are you a caregiver of people with mental illness?</b>                            |         |
| Yes                                                                                  | 0       |

|                                                                 |   |
|-----------------------------------------------------------------|---|
| No                                                              | 1 |
| Do you have a family member who has experienced mental illness? |   |
| Yes                                                             | 0 |
| No                                                              | 1 |
| Have you experienced a mental illness?                          |   |
| Yes                                                             | 0 |
| No                                                              | 1 |
| Socioeconomic status                                            |   |
| Low class                                                       | 1 |
| Medium-low class                                                | 2 |
| Medium class                                                    | 3 |
| Medium-high class and High class                                | 4 |
| Contact or familiarity with PWMI group                          |   |
| No-contact or familiarity with PWMI at all                      | 1 |
| Contact or familiarity with PWMI                                | 2 |
| All-contact or familiarity with PWMI                            | 3 |

---
